# Supplementary figures and images for: Does Suicidal Ideation as Measured by the PHQ-9 Predict Suicide Among VA Patients?
Source: Atypon-hosted journal article supplement (doi:10.1176/appi.ps.201500149), 2016-01-14

Plot of the suicide-specific cumulative incidence functions by PHQ-9 item 9 response

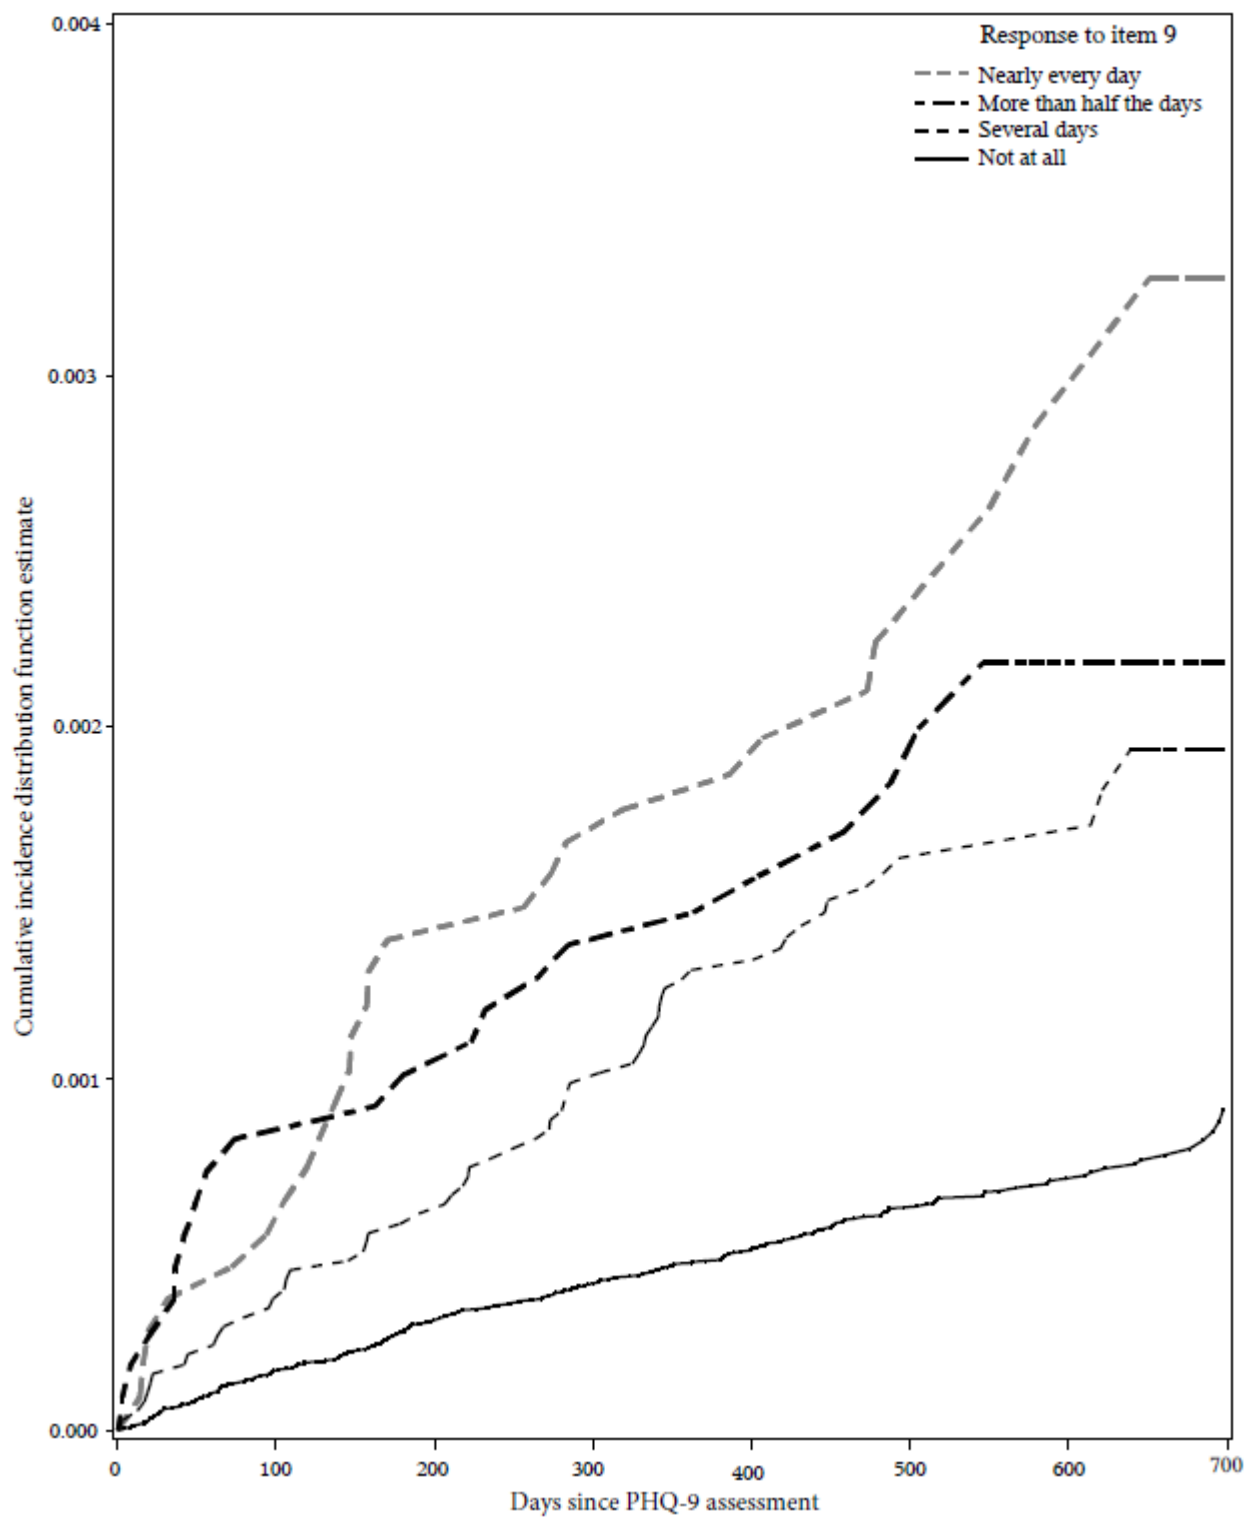

Supplement: appi.ps.201500149.ds001.pdf [file appi.ps.201500149.ds001.pdf]
